# Supplementary figures and images for: In silico Analysis of Genetic Diversity of Human Hepatitis B Virus in Southeast Asia, Australia and New Zealand
Source: MDPI journal article supplement (doi:10.3390/v12040427), 2020-04-09

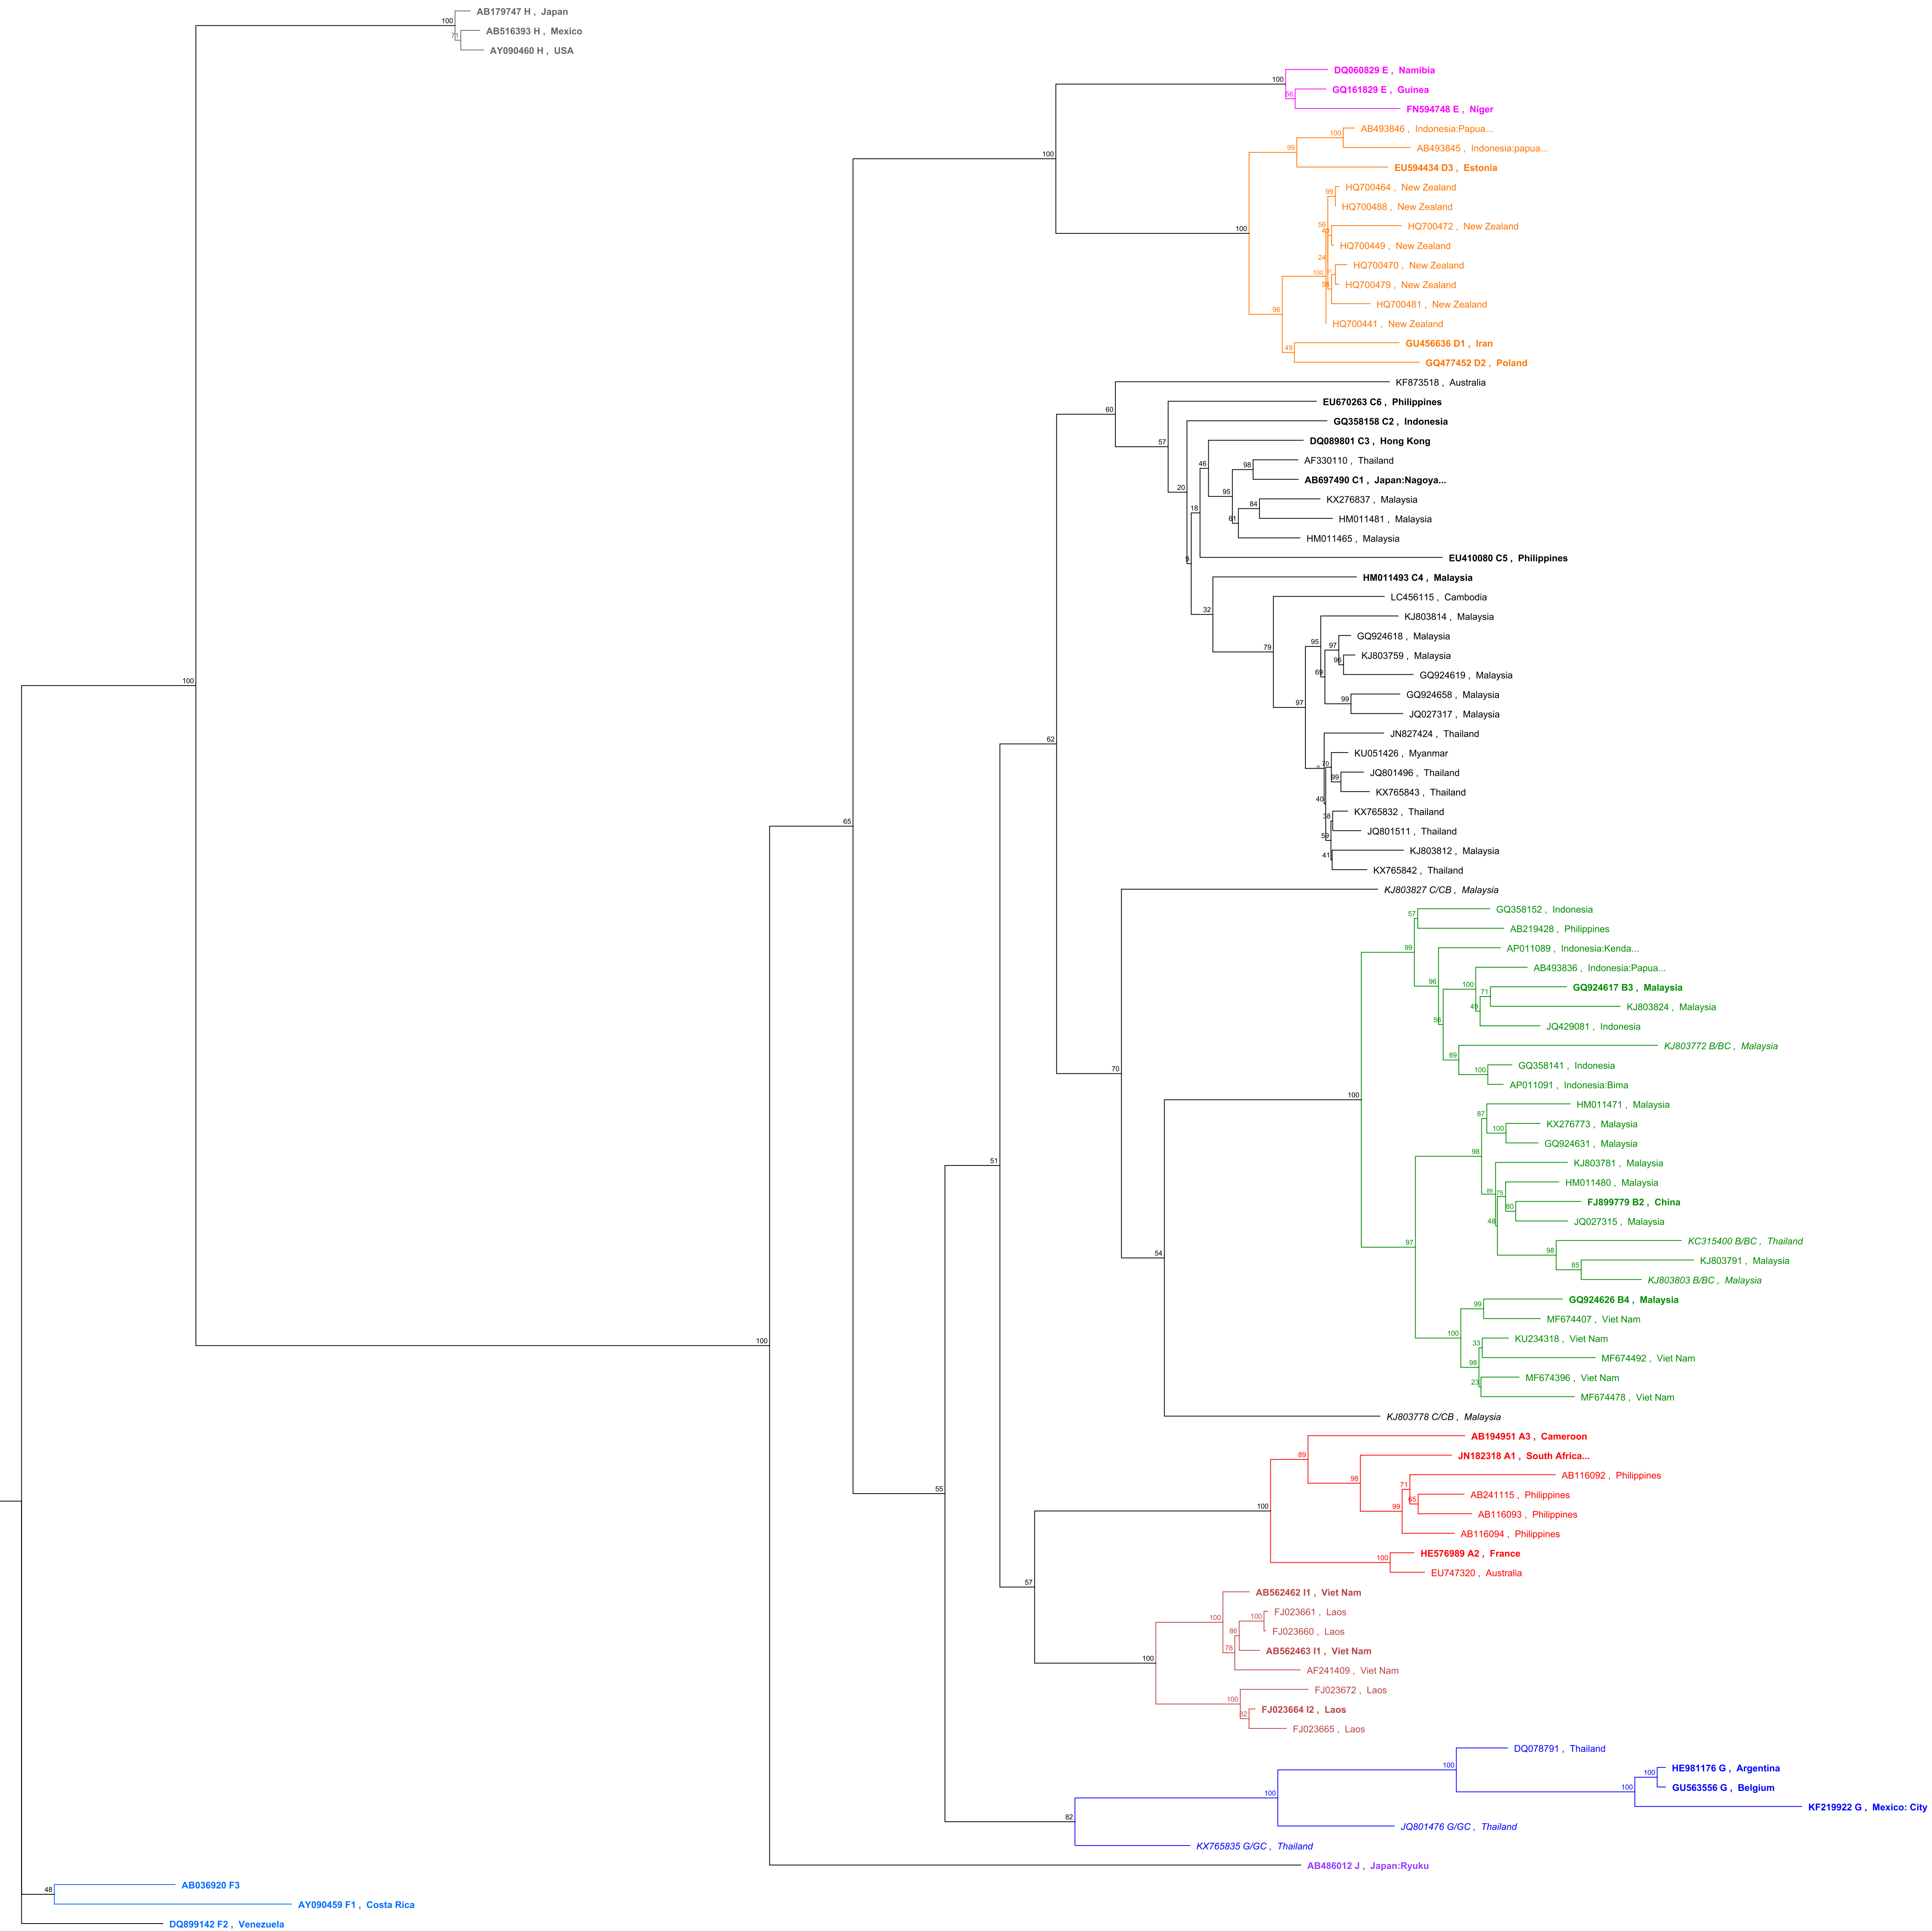

Supplement: s1 [file s1]

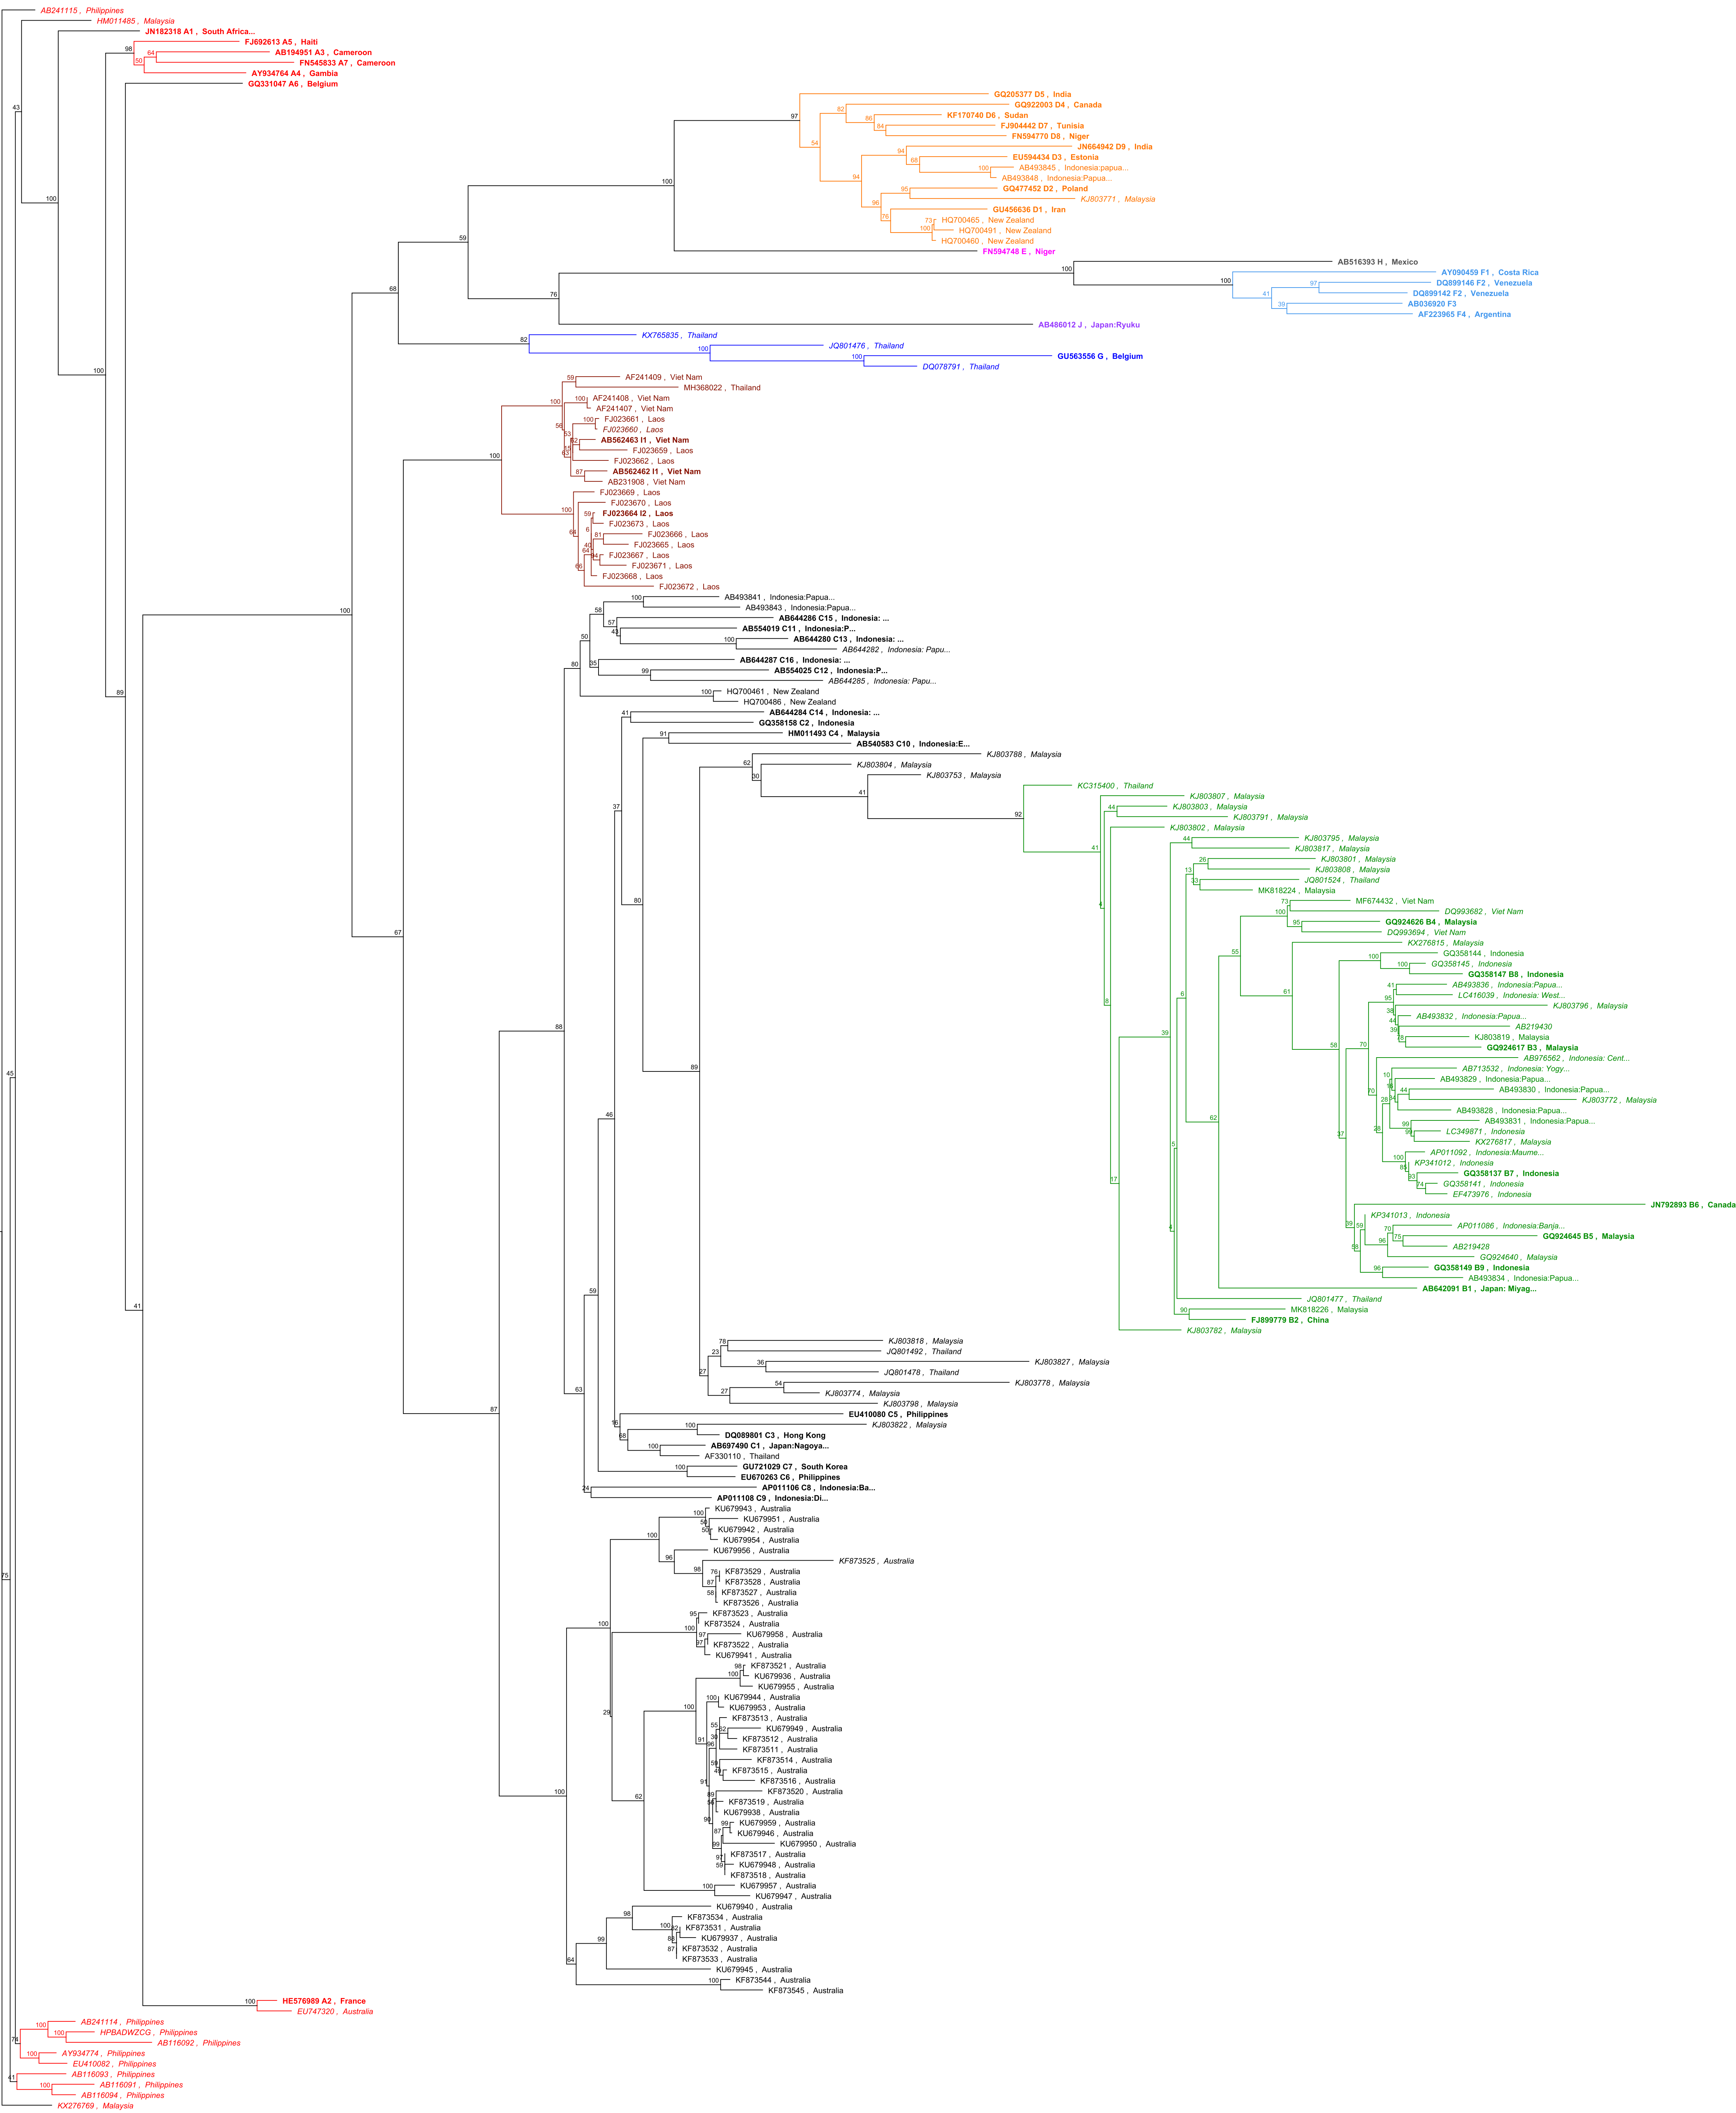

Supplement: s1 [file s1]

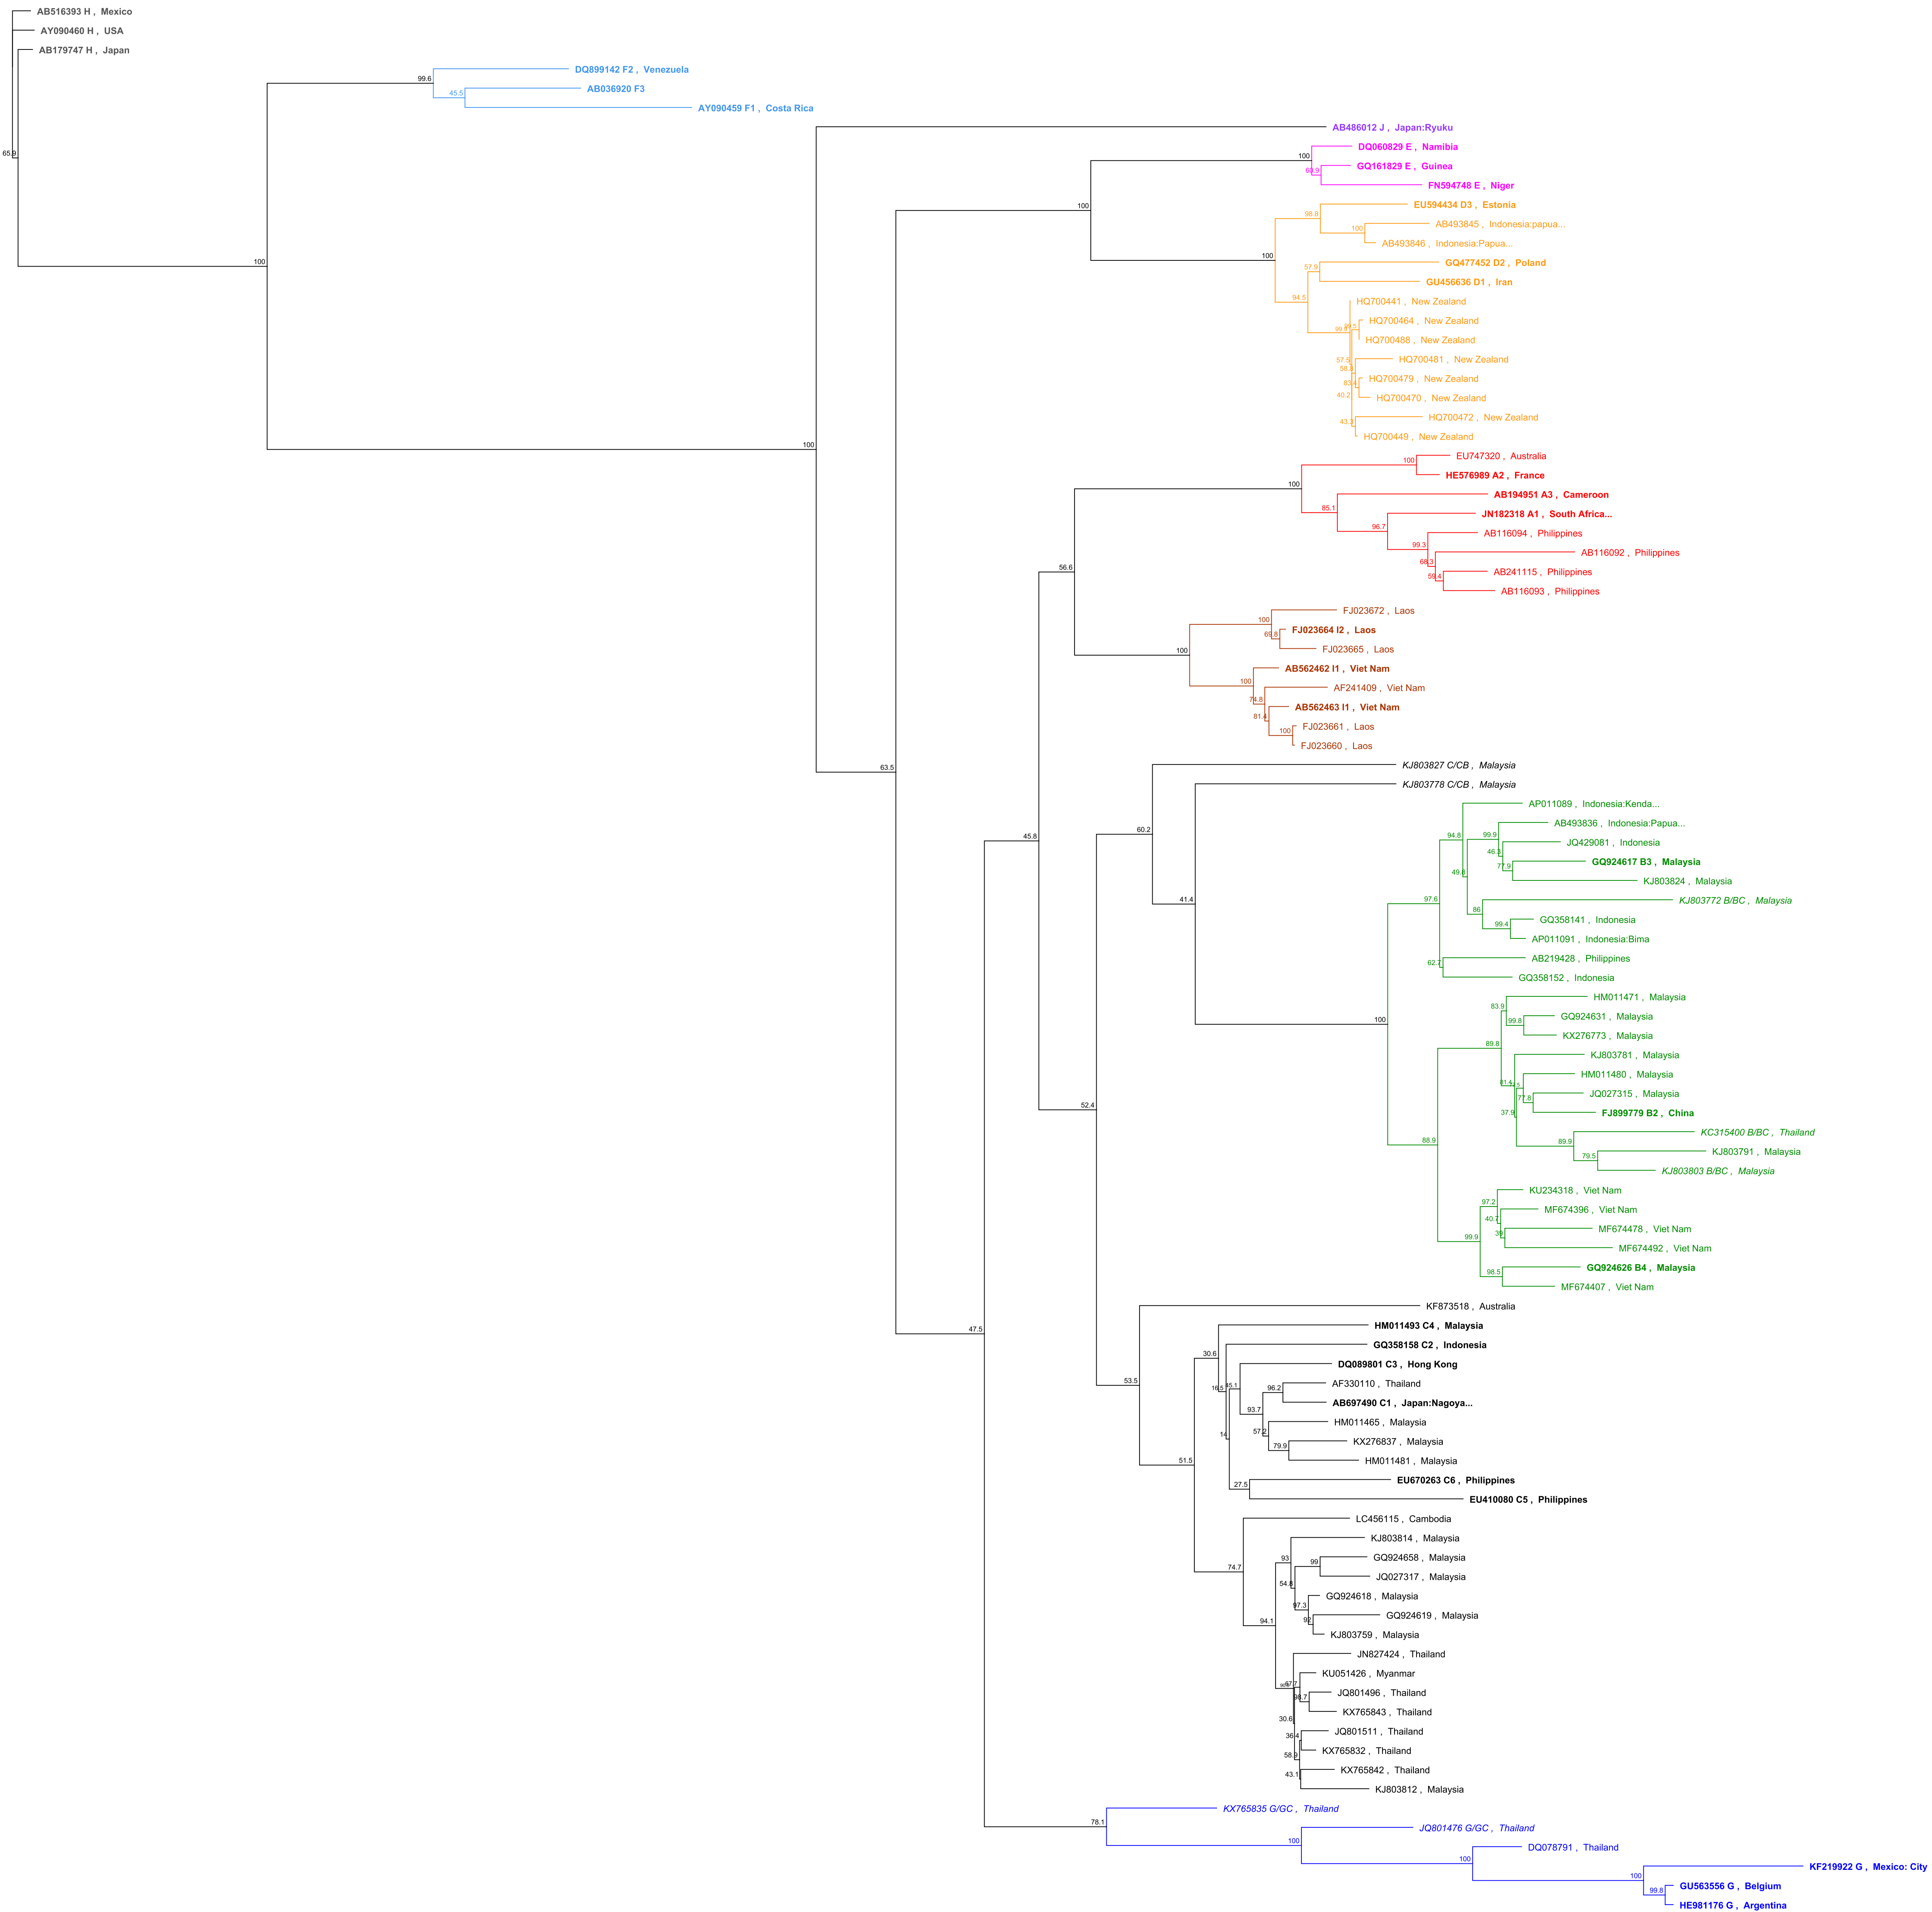

Supplement: s1 [file s1]

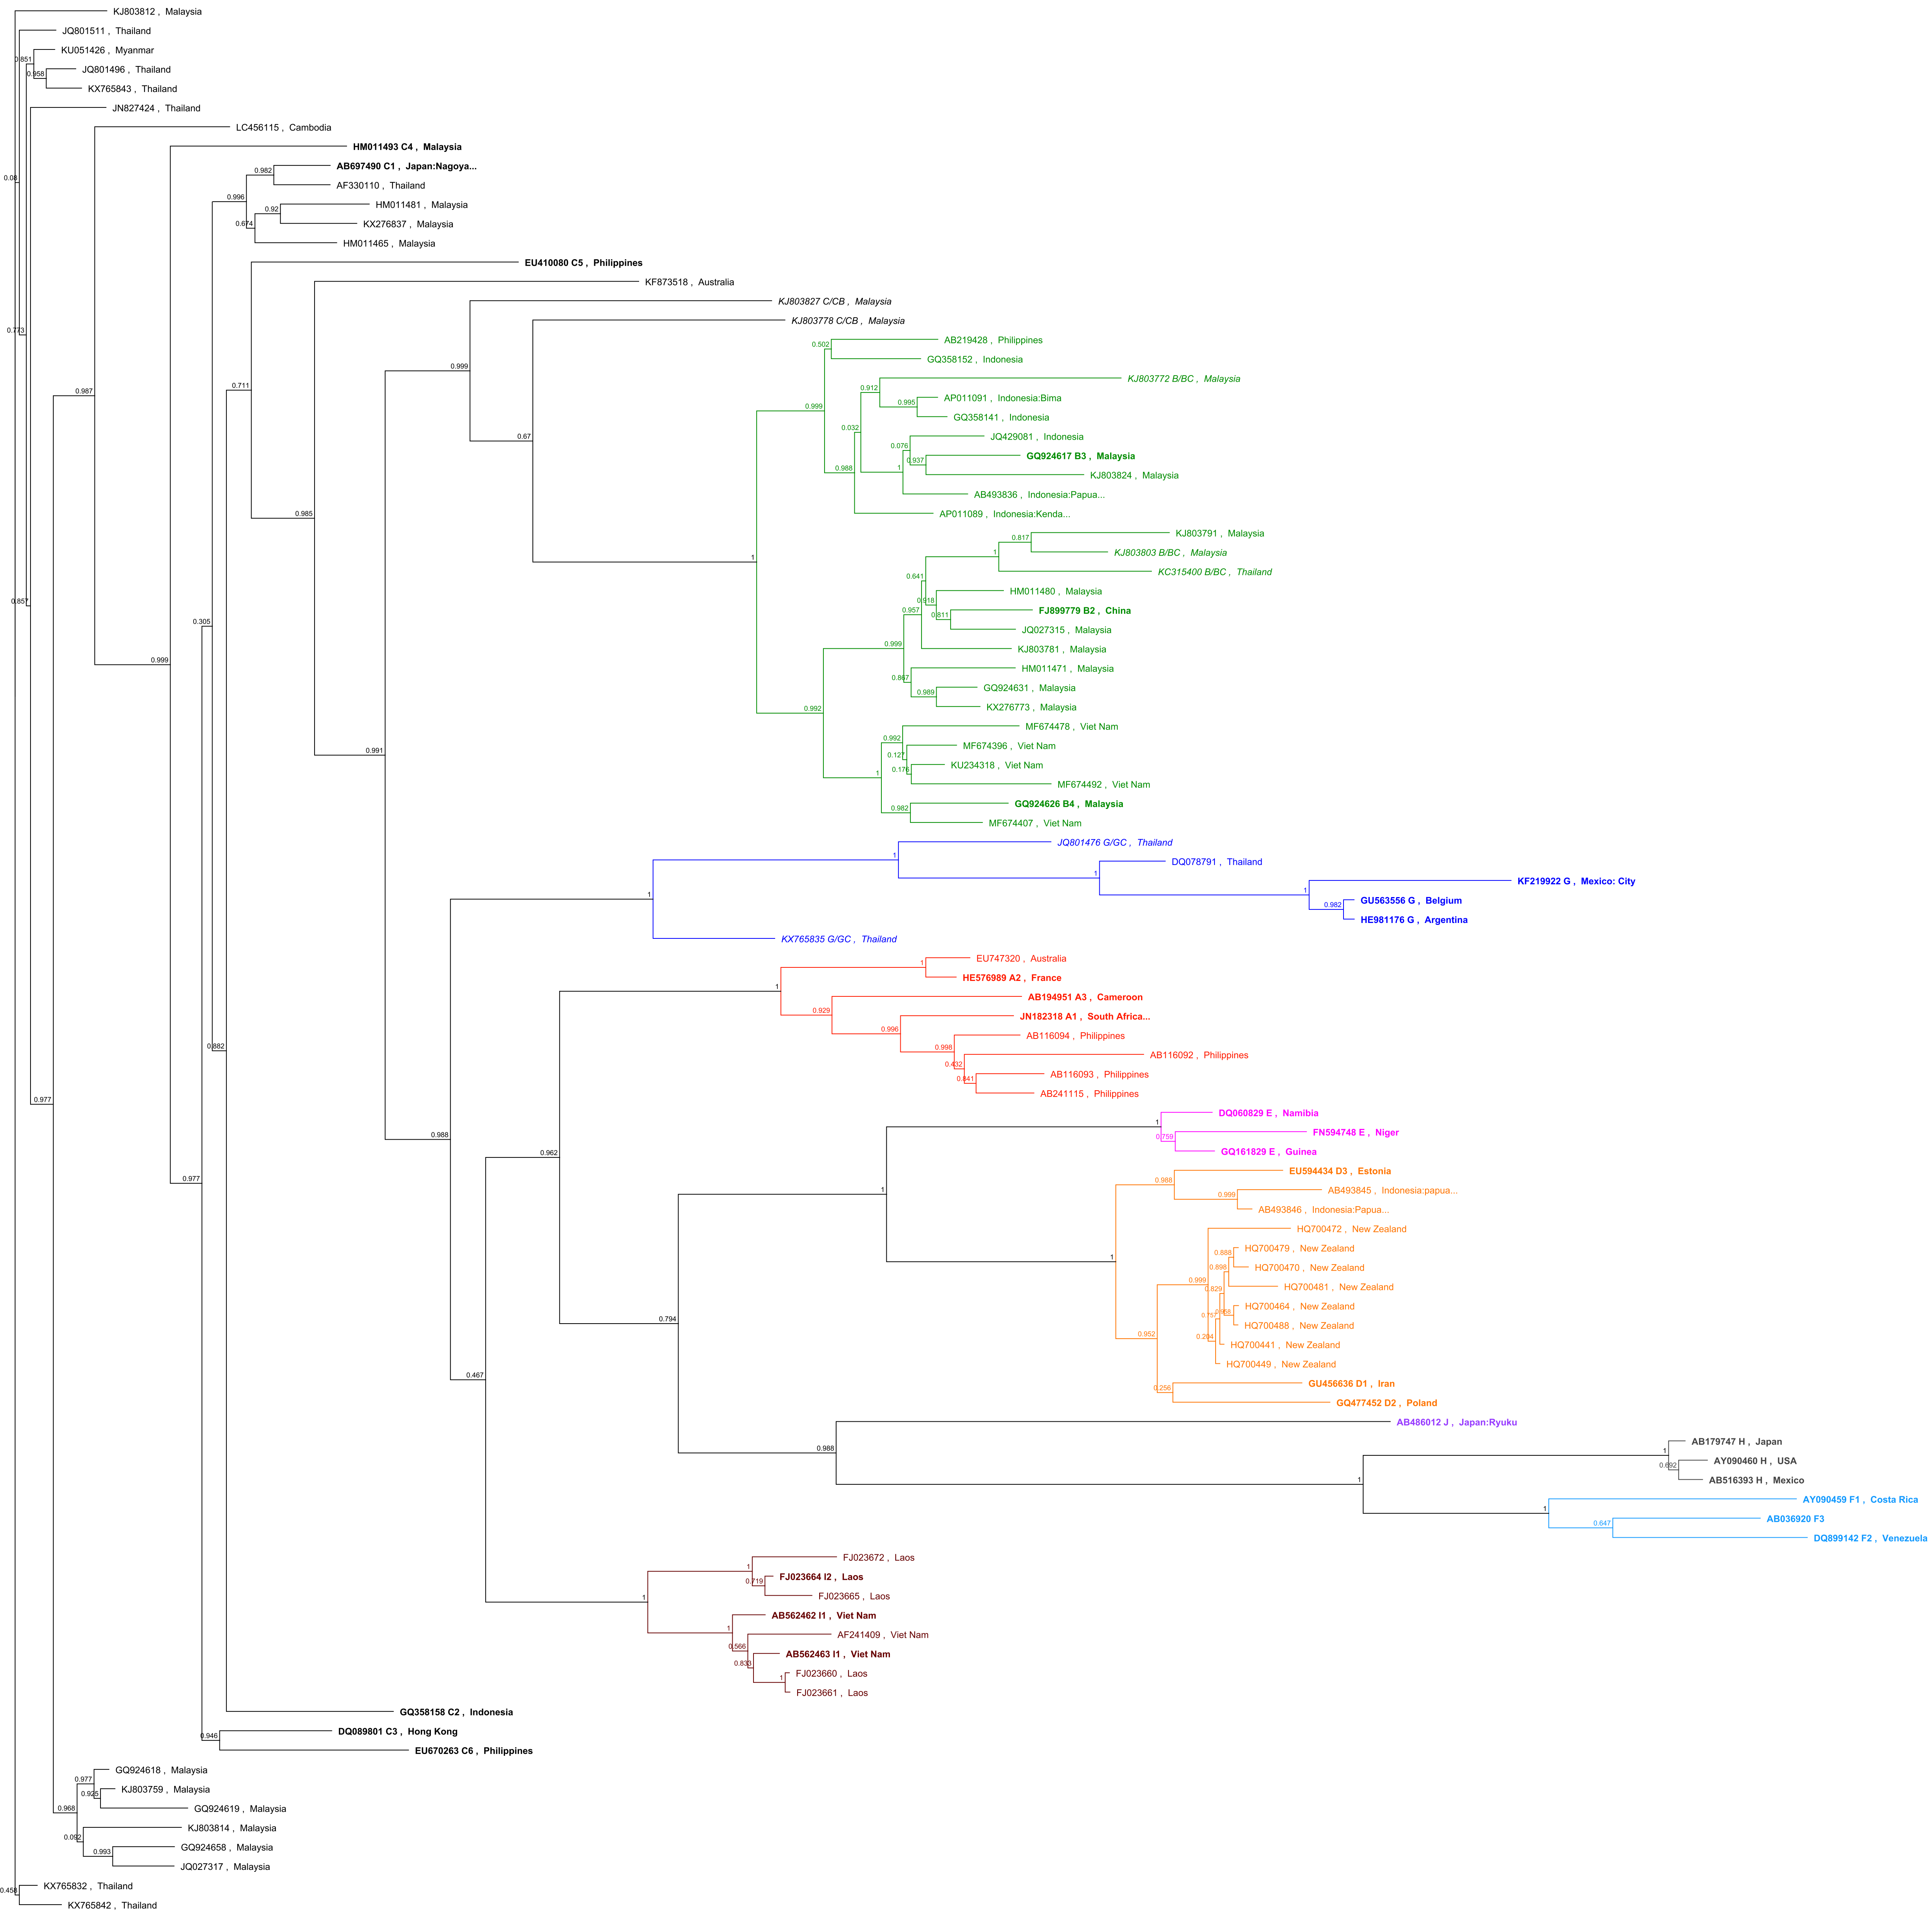

Supplement: s1 [file s1]
